# Supplementary material for: A Common Control Group - Optimising the Experiment Design to Maximise Sensitivity
Source: PLoS One. 2014 Dec 11;9(12):e114872. doi: 10.1371/journal.pone.0114872 (PMC4263717; doi:10.1371/journal.pone.0114872)
Supplement: S1 Derivations — Determining the optimum control group replication. (DOCX) [file pone.0114872.s001.docx]

# ****Derivations S1. Determining the optimum control group**** replication

**Theorem (Scenario 1)**

Consider an experiment involving oftreatment groups and a single common control group, where conditions 1-5 described in the results section of the paper hold. Assume that:

- The replication in all of the treatment groups
- The replication in the control group, whereis a positive number that is not necessarily an integer.
- The total number of animals in the experiment*.*

We also assume that the purpose of the experiment is to compare the treatment group means back to control group mean (see Scenario 1) using a suitable parametric test [8].

The number of animals that should be allocated to the control group, so that the standard error of the estimate of the comparisons between each treatment group and the control group is minimised, is given by:

i.e.

**Proof**

Consider the null hypothesis that there is no difference between thetreatment mean and the control group mean, i.e.

whereis the effect of thetreatment andis the effect of the control.

Without loss of generality, we assess this hypothesis by considering comparison, where

is the treatment mean andis the control group mean.

The standard error of this comparisonis given by

whereis the variance and

To obtain the most reliable estimate of, for a given level of variability and total sample size, we need to minimise.

Now

i.e.

Therefore, substituting (4) in (3) gives

To find the value ofwhich minimiseswe need to differentiatewith respect to, and set to zero.

Now

andwhen

i.e.

.

While this is a solution of, it could be a minimum or maximum solution. To confirm it is the minimum solution, we differentiate (6) again, i.e.

As,andthis implies that

Asandwhenwe therefore know thatis minimised when.

**Theorem (Scenario 2)**

Consider an experiment involving oftreatment groups and a single common control group, where conditions 1-5 described in the results section of the paper hold. Assume that:

- The replication in all of the treatment groups
- The replication in the control group, whereis a positive number that is not necessarily an integer.
- The total number of animals in the experiment*.*

If all pairwise comparisons are of interest to the researcher, i.e. not only the comparisons of treatments versus control but also the comparisons between the treatments themselves, then the replication in the control group should be

i.e..

**Proof**

From equation (2) above the standard error of the estimate of a treatment versus control comparisonis given by:

Similarly, the standard error of an estimate of a pairwise comparison of two treatmentsis given by

Now as all comparisons are of equal importance, we require the standard error of the estimates of all comparisons to be the same, i.e.. Therefore

Cancelling-outin (9), squaring and replacingbygives

i.e.

which gives.
